# Supplementary material for: TCP Doped with Metal Ions Reinforced with Tetragonal and Cubic Zirconia
Source: MDPI journal article supplement (doi:10.3390/biomimetics8080599), 2023-12-12
Supplement: s1 [file s1]

## Supplementary Materials

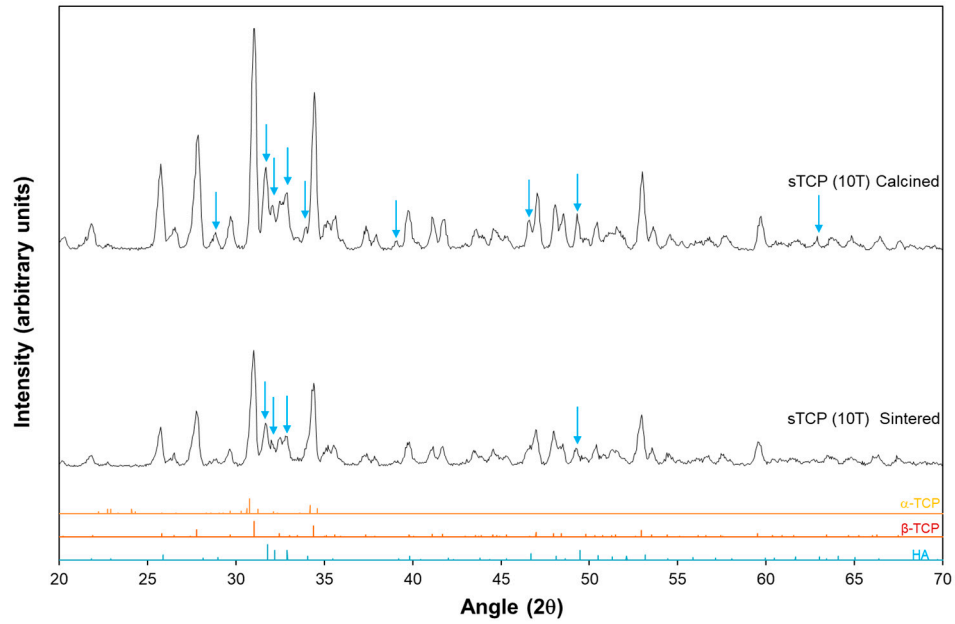

**Figure S1.** X-ray diffraction spectra of the biocomposites 10T (sTCP) after calcination and after sintering and X-ray diffraction spectra of the theoretical cards #09-0432, #09-0169, and #09-0348, corresponding to HA,  $\beta$ -TCP, and  $\alpha$ -TCP, respectively.

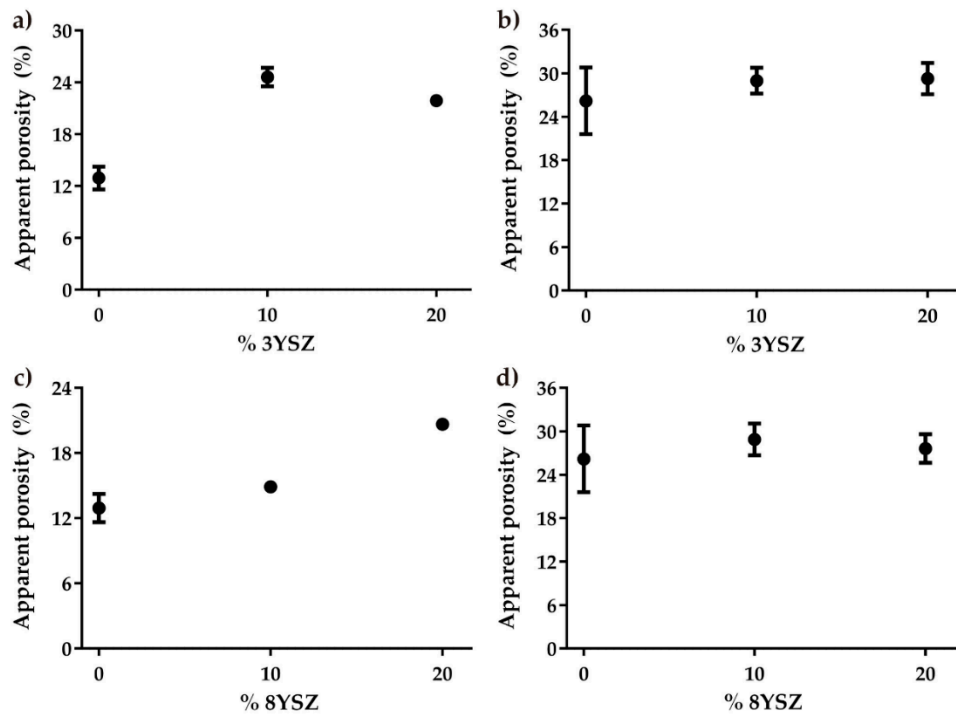

**Figure S2.** Apparent porosity of the composites: a) dense reinforced with 3YSZ; b) manufactured with PMMA and reinforced with 3YSZ; c) dense reinforced with 8YSZ; d) manufactured with PMMA and reinforced with 8YSZ.

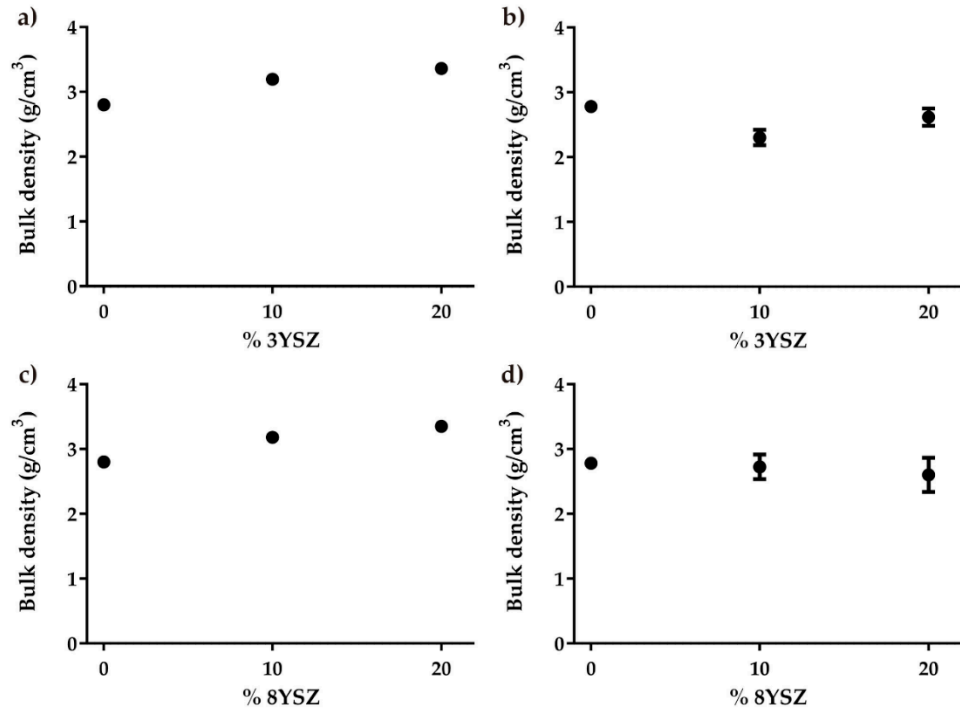

**Figure S3.** Bulk density of the composites: a) dense reinforced with 3YSZ; b) manufactured with PMMA and reinforced with 3YSZ; c) dense reinforced with 8YSZ; d) manufactured with PMMA and reinforced with 8YSZ.

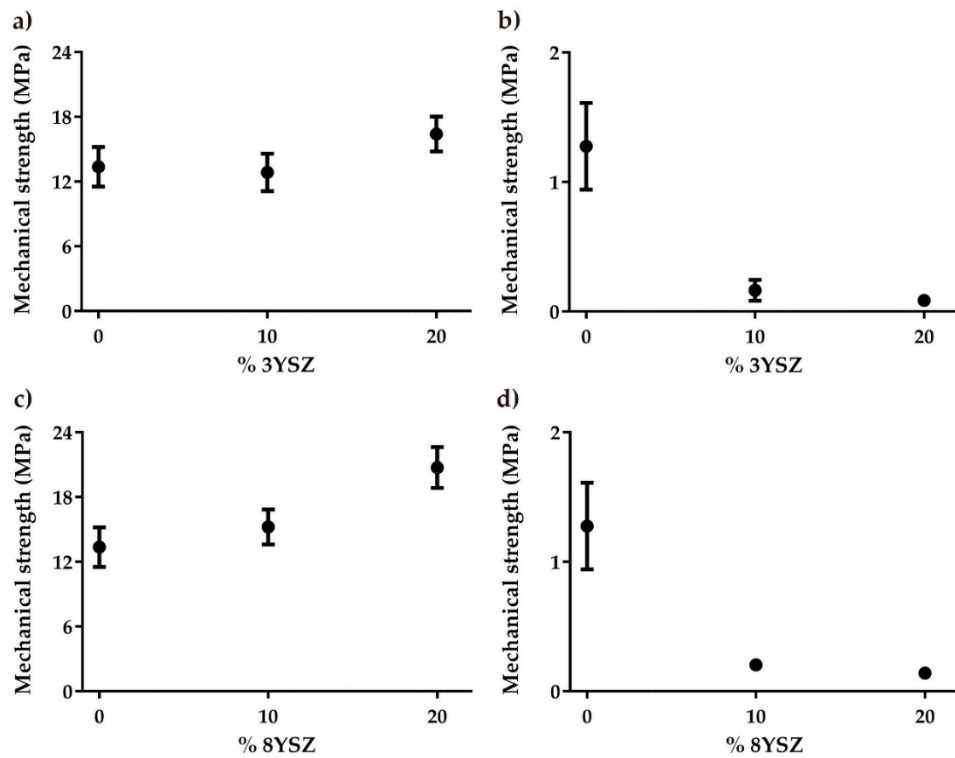

**Figure S4.** Mechanical strength of the composites: a) dense reinforced with 3YSZ; b) manufactured with PMMA and reinforced with 3YSZ; c) dense reinforced with 8YSZ; d) manufactured with PMMA and reinforced with 8YSZ.
